1 Detection of urease and carbonic anhydrase activity  
2 using a rapid and economical field test to assess  
3 microbially-induced carbonate precipitation

4 *Fernando Medina Ferrer*<sup>1\*</sup>, *Kathryn Hobart*<sup>1,2</sup>, *Jake V. Bailey*<sup>1\*</sup>.

5 <sup>1</sup>Department of Earth Sciences, College of Science & Engineering, University of Minnesota,  
6 Twin Cities. John T. Tate Hall, 116 Church Street SE, Room 150, Minneapolis, Minnesota  
7 55455, United States.

8 <sup>2</sup>Institute for Rock Magnetism, University of Minnesota, Twin Cities. John T. Tate Hall, 116  
9 Church Street SE, Minneapolis, Minnesota 55455.

10 KEYWORDS: Calcium carbonate; carbon sequestration; MICP; CaCO<sub>3</sub>; biomineralization;  
11 biocementation; biogrouting.

12 \*Corresponding Authors: medinaferrer@gmail.com; baileyj@umn.edu.

13

## 14 **ABSTRACT**

15           Microbial precipitation of calcium carbonate has diverse engineering applications, from  
16 building and soil restoration, to carbon sequestration. Urease-mediated ureolysis and CO<sub>2</sub>  
17 (de)hydration by carbonic anhydrase (CA) are known for their potential to precipitate carbonate  
18 minerals, yet many microbial community studies rely on marker gene or metagenomic  
19 approaches that are unable to determine *in situ* activity. Here, we developed fast and cost-  
20 effective tests for the field detection of urease and CA activity using pH-sensitive strips inside  
21 microcentrifuge tubes that change color in response to the reaction products of urease (NH<sub>3</sub>) and  
22 CA (CO<sub>2</sub>). Samples from a saline lake, a series of calcareous fens, and ferrous springs were  
23 assayed in the field, finding relatively high urease activity in lake samples, whereas CA activity  
24 was only detected in a ferrous spring. Incubations of lake microbes with urea resulted in  
25 significantly higher CaCO<sub>3</sub> precipitation compared to incubations with a urease inhibitor.  
26 Therefore, the rapid assay indicated an on-site active metabolism potentially mediating carbonate  
27 mineralization. Field urease and CA activity assays complement molecular approaches and  
28 facilitate the search for carbonate-precipitating microbes and their *in situ* activity, which could be  
29 applied toward agriculture, engineering and carbon sequestration technologies.

30

## 31 **INTRODUCTION**

32           Microbially-induced carbonate precipitation (MICP) has been explored as an alternative  
33 solution for several engineering and environmental challenges, such as restoration of building,  
34 monument, and concrete structures, soil consolidation, pollutant bioremediation and CO<sub>2</sub>  
35 sequestration.<sup>1-4</sup> Despite its relevance in the carbon cycle and its multiple applications, MICP is

36 difficult to assess directly in a given environment. Current environmental microbiota analyses  
37 commonly characterize communities via 16S rRNA gene sequencing and metagenomic  
38 sequencing, which fail to determine active metabolisms, unless challenging and labor-intense  
39 transcriptomic or culture-based analysis are performed, which do not necessarily reflect *in situ*  
40 activity. It is possible, however, to directly test the activity of certain enzymes in the field and  
41 identify active metabolisms on-site. Here, we developed a method for the field detection of  
42 carbonic anhydrase (CA; EC 4.2.1.1) and urease (EC 3.5.1.5) activity, two enzymes associated  
43 with MICP.

44 Metabolisms such as photosynthesis, methane oxidation, nitrate reduction, bicarbonate  
45 transport and ureolysis can locally increase carbonate saturation and promote MICP.<sup>4,5</sup> Two of  
46 these metabolisms rely on enzymes whose activity can be detected in the field: ureolysis and CO<sub>2</sub>  
47 hydration via CA. Ureolysis, catalyzed by urease, allows microorganisms to use urea as a  
48 nitrogen and carbon source.<sup>6</sup> CA facilitates rapid carbon transport into the cell via CO<sub>2</sub>-HCO<sub>3</sub><sup>-</sup>  
49 interconversion.<sup>7</sup> Both enzymes generate carbonate anions and increase the pH as a product of  
50 their activity. Urease generates ammonia and CO<sub>2</sub> from urea (eq. 1), which coupled to ammonia  
51 hydrolysis and CO<sub>2</sub> hydration, catalyzed by CA (eq. 2), produces one mol of hydroxide and one  
52 mol of bicarbonate per mol of urea (eq. 3):

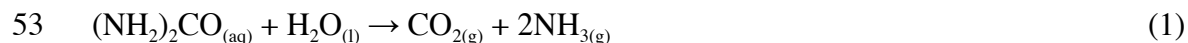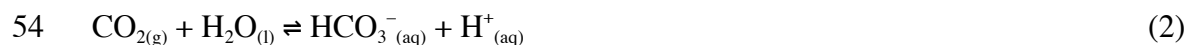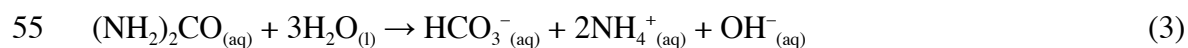

56 Urease and CA have been widely associated with MICP in a variety of environments.<sup>4,8-10</sup>  
57 Ureolytic microbes have been applied in the restoration of buildings, soil consolidation and  
58 bioremediation,<sup>3,11-15</sup> while CA has been proposed as an eco-friendly carbon sequestration  
59 technology to mitigate global warming.<sup>2,16,17</sup> Yet, urease and CA effects are commonly evaluated

60 via culture-based approaches, disregarding the activity of complex communities *in situ*. We  
61 evaluated on-site urease and CA activities using a rapid test applied to samples from calcareous  
62 fens, iron-rich springs, and a saline lake. In these settings, the environmental conditions may lead  
63 to carbonate precipitation, however, the contribution of MICP is difficult to assess in the absence  
64 of a field assay. By using a field test, we obtained a preliminary assessment of potential MICP,  
65 which can be applied to the management of urease- and CA-based technologies.

66

## 67 **MATERIALS AND METHODS**

### 68 **Rapid urease field test**

69 Urease activity was evaluated by a modification of the rapid urease test for *Helicobacter*  
70 *pylori* detection.<sup>18,19</sup> The test consists of a sample-loading strip and an indicator strip (see a  
71 detailed preparation protocol in the supporting information). Sample-loading strips were  
72 prepared by immersing a cellulose paper in a fresh 0.6 M urea, 0.4 mM EDTA solution and  
73 drying the paper at room temperature. Indicator strips were similarly prepared by impregnating a  
74 paper with fresh 0.02% phenol red pH 6.0. Small strips of equal area (33 mm<sup>2</sup>) were cut from the  
75 urea-impregnated paper and circles of 6.5 mm diameter cut from the indicator-impregnated  
76 paper. Individual sample-loading strips were introduced in Seal-Rite 0.5 mL microcentrifuge  
77 tubes and indicator strips were placed inside the seals of the caps (**Figure 1A**). Urease activity  
78 was detected by adding standard solutions of urease from *Canavalia ensiformis* (Sigma-Aldrich,  
79 St. Louis, Missouri, USA) or wet biofilm samples in direct contact with the sample-loading strip  
80 before tightly closing the tube. A positive reaction was visualized by a color change from yellow  
81 to red in the indicator strip after ~5 to 60 minutes of incubation at room/field temperature  
82 (**Figure 1B**). Volatile ammonia released from urea (eq. 1) increases the pH in the indicator strip,

83 changing its color (**Figure 1C**). A negative control was prepared under the same conditions and  
 84 additionally adding 1 mM phenyl phosphorodiamidate (PPD)—a urease inhibitor—in the  
 85 soaking solution of sample-loading strips. A positive reaction without the inhibitor and a  
 86 negative reaction with PPD strongly indicate urease activity.

87

88

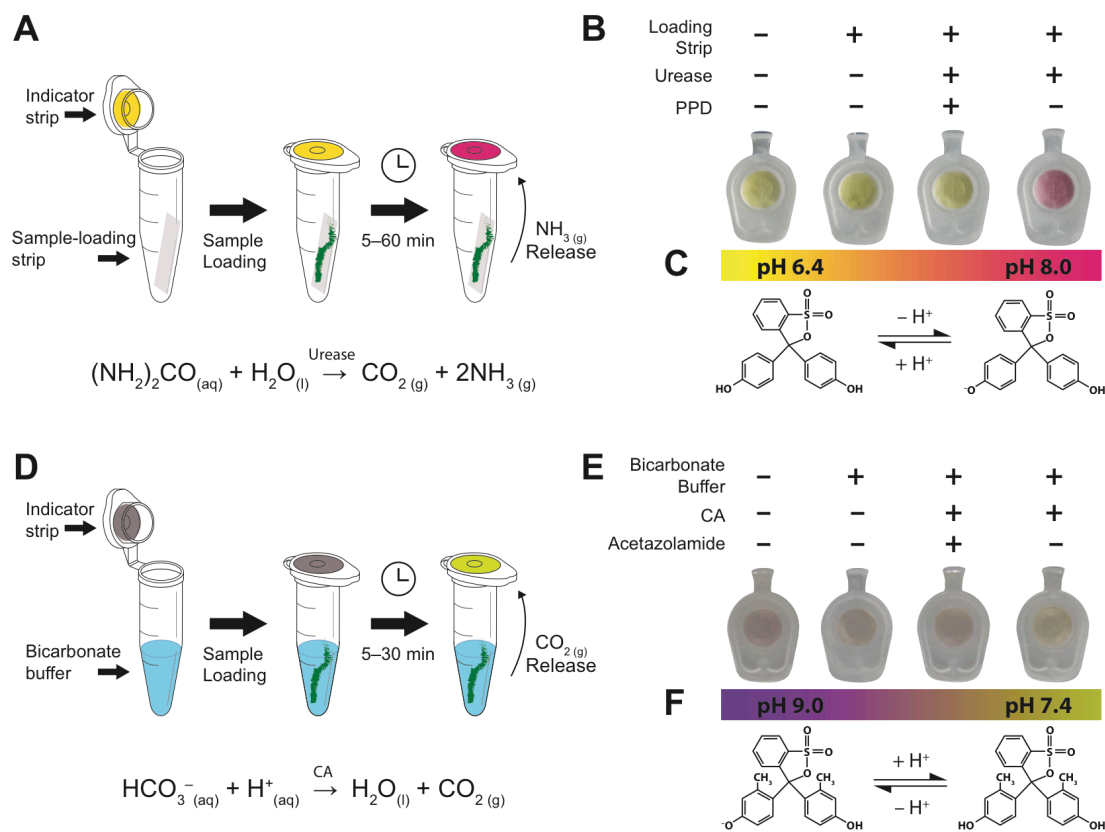

89

90 **Figure 1.** Urease and CA field tests. (A) Representation of a positive urease assay after adding a  
 91 biofilm sample in direct contact with the loading strip. (B) A switch to red in the tube cap  
 92 (indicator strip) indicates a positive urease reaction. If no urease is present or if a loading strip  
 93 with urease inhibitor (PPD) is assayed, the indicator is expected to remain yellow. (C) Color  
 94 transition of phenol red (pKa 7.4, pH range 6.4–8.0) used for urease tests. (D) CA assay scheme

95 after adding a sample in the tube with bicarbonate solution. (E) Faster development of a yellow  
96 color in the indicator than a negative control (no sample added or using a CA inhibitor) indicates  
97 positive CA activity. (F) Color transition of metacresol purple (pKa 8.32, pH range 7.4–9.0) used  
98 for CA assays.

99

## 100 **Rapid CA field test**

101 CA assays were prepared using a CO<sub>2</sub> detection method intended for proper endotracheal  
102 catheter introduction.<sup>20</sup> CO<sub>2</sub>-sensitive strips were prepared by soaking a cellulose paper with  
103 fresh 0.0065 M Na<sub>2</sub>CO<sub>3</sub>, 0.01% metacresol purple, 50% glycerol diluted with N<sub>2</sub>-purged distilled  
104 water (see detailed preparation protocol in the supporting information). Impregnated papers were  
105 immediately dried by a stream of hot air and circles of 6.5 mm were cut and placed inside the cap  
106 seals of 0.5 mL tubes (**Figure 1D**). The bluish-purple indicator gradually turns purplish-yellow  
107 after one to three days of exposure to atmospheric CO<sub>2</sub>. We either used freshly prepared  
108 indicator strips or stored them for few days inside a tube containing Ca(OH)<sub>2</sub> to minimize color  
109 changes. CA activity was detected by introducing 80 μL of cold 1 M NaHCO<sub>3</sub> in the tubes and  
110 adding the samples or 15 μL of standard CA (isozyme II from bovine erythrocytes; Sigma-  
111 Aldrich, St. Louis, Missouri, USA) solutions. The tubes were immediately closed and incubated  
112 on ice. Bicarbonate dehydration (catalyzed by CA, eq. 2) produces volatile CO<sub>2</sub>, which reacts  
113 with glycerol-absorbed water in the indicator lid and generates acidity that turns the indicator  
114 from bluish-purple to purplish-yellow (**Figure 1E**). Non-enzymatic bicarbonate dehydration  
115 proceeds rapidly and therefore the indicator color change is observed within minutes, even  
116 without the enzyme. By using the CO<sub>2</sub>-sensitive strips in microcentrifuge tubes we found a  
117 subtle, but reproducible, color change difference between CA-incubated (10–100 mM CA) and

118 negative controls. Negative controls were prepared under the same conditions and adding 5  $\mu$ L  
119 of fresh 1 mM acetazolamide—a CA inhibitor—to the bicarbonate buffer. A faster color change  
120 compared to negative controls is indicative of CA activity.

121

## 122 **Microbial sampling locations**

123 Samples were taken near calcareous fens in the Minnesota River Basin, from ferrous  
124 springs and from Salt Lake, MN, during July and August 2019 (see detailed locations in **Figure**  
125 **S1** and **Table S1**). Salt Lake is an alkaline sulfate- and sodium-dominated saline lake.<sup>21</sup> The lake  
126 alkalinity ( $234 \pm 2$  mg/L CaCO<sub>3</sub>, pH 8–9), together with calcium carbonates in its sediments,<sup>21</sup>  
127 indicates favorable conditions for carbonate mineral precipitation, which could be stimulated by  
128 microbial metabolisms. A sample of buoyant green biomass was collected from Salt Lake during  
129 a bloom event in July 2019. Submerged green filaments attached to shoreland rushes were also  
130 collected following the bloom in August 2019 (**Figure S2**).

131 Calcareous fens, peatlands in which surficial calcium carbonate precipitates,<sup>22</sup> are also  
132 environments where microorganisms may contribute to carbonate mineralization. Samples were  
133 collected from green biofilms growing on peat exposed by a creek at Black Dog Lake Fen, and  
134 from surficial green filaments suspended on water ponds during flood events in Nicols Meadow  
135 Fen, and between Fontier 8 Fen and Sioux Nation WMA Fen (locations shown in **Table S1** and  
136 **Figure S3**). Additionally, samples from iron-oxidizing microbes were collected from orange  
137 precipitates at a creek in Nicols Meadow Fen, from groundwater seeping to the Mississippi River  
138 at Saint Mary's Spring, and from a sulfide seep at a roadside near Soudan, MN (**Figure S4**). A  
139 small portion of biomass (enough to wet the sample-loading strip of the urease assay) was  
140 evaluated on-site in triplicate (with the exception of the Salt Lake bloom sample, where only two

141 samples were evaluated) for urease and CA activity using the rapid field test. Additional  
142 triplicate aliquots for each sample were obtained for protein extraction and microscopic  
143 observations (supporting information).

144

### 145 **Calcium depletion kinetics**

146 Salt Lake filaments (Sample ID 02 in **Table S1**) were incubated (0.5 g wet weight) in 20  
147 mL of 0.2  $\mu\text{m}$ -filtered lake water with the addition of 0.8 M urea in closed 50-mL glass serum  
148 bottles with agitation (90 rpm, orbital shaker MaxQTM 2000, Thermo Fisher Scientific) at room  
149 temperature and under natural light cycles for 12 days. Four different incubation conditions were  
150 evaluated in triplicate: lake water without inhibitors, lake water with 1 mM acetazolamide, lake  
151 water with 1 mM PPD, and lake water with both inhibitors (1 mM each). Aliquots of 0.5 mL  
152 were taken over time and titrated with EDTA (HAC-DT, Hach, Loveland, CO, USA) to quantify  
153 calcium. Solid residues after incubations were evaluated by powder micro X-ray diffraction  
154 (micro-XRD) using a Bruker D8 Discover micro-diffractometer with a  $\text{CoK}\alpha$  source ( $\lambda =$   
155  $1.78899 \text{ \AA}$ ) equipped with a graphite monochromator and a 2D Vantec 500 detector. Samples  
156 were mounted on vacuum grease and three frames ( $30^\circ$   $2\theta$  width) centered at  $20^\circ$ ,  $45^\circ$  and  $70^\circ$   
157 were collected for 900 s at 40 kV and 35 mA. Phase identification was conducted using Match!  
158 (v3.8.3.151) and the Crystallographic Open Database (COD-Inorg REV218120 2019.09.10)  
159 reference patterns for aragonite (96-901-6601), calcite (96-900-0971), monohydrocalcite (96-  
160 901-2074), quartz (96-901-0145), thenardite (96-900-4093) and vaterite (96-150-8972). Ikaite  
161 diffraction pattern was obtained from Hesse and Kueppers (1983).<sup>23</sup>

162

### 163 **Statistical analysis**



164 To compare and semi-quantify the rapid test results, we followed color changes using hue  
165 values. The hue represents color pigmentation by a single number, disregarding saturation and  
166 brightness, therefore, minimizing color differences resulting from light and exposure time  
167 changes in the field (**Figure S5**). Average hue values were calculated from RGB colors of  
168 standard circle areas over photographs of the indicator strips using the NIH ImageJ 1.49v  
169 software. Statistical significance in the rapid assays and in the calcium depletion kinetics was  
170 assessed via a Student's t-test using GraphPad Prism 5.0.

171

## 172 **RESULTS AND DISCUSSION**

### 173 **Rapid test sensitivity and reproducibility**

174 A pH-sensitive dye encapsulated within a cellulose matrix was used as a detector of NH<sub>3</sub>  
175 or CO<sub>2</sub> inside the cap of microcentrifuge tubes. Urease activity was followed by an ammonia-  
176 mediated pH increase, whereas CA was detected by a pH decrease. The test format in **Figure 1**  
177 turns a phenol red indicator from yellow to red in less than 15 minutes when >30 mU urease is  
178 assayed (**Figure 2A**). After 30 minutes, the method sensitivity is ~3 mU, when compared to a  
179 PPD-containing negative control (**Figure 2B**).

180

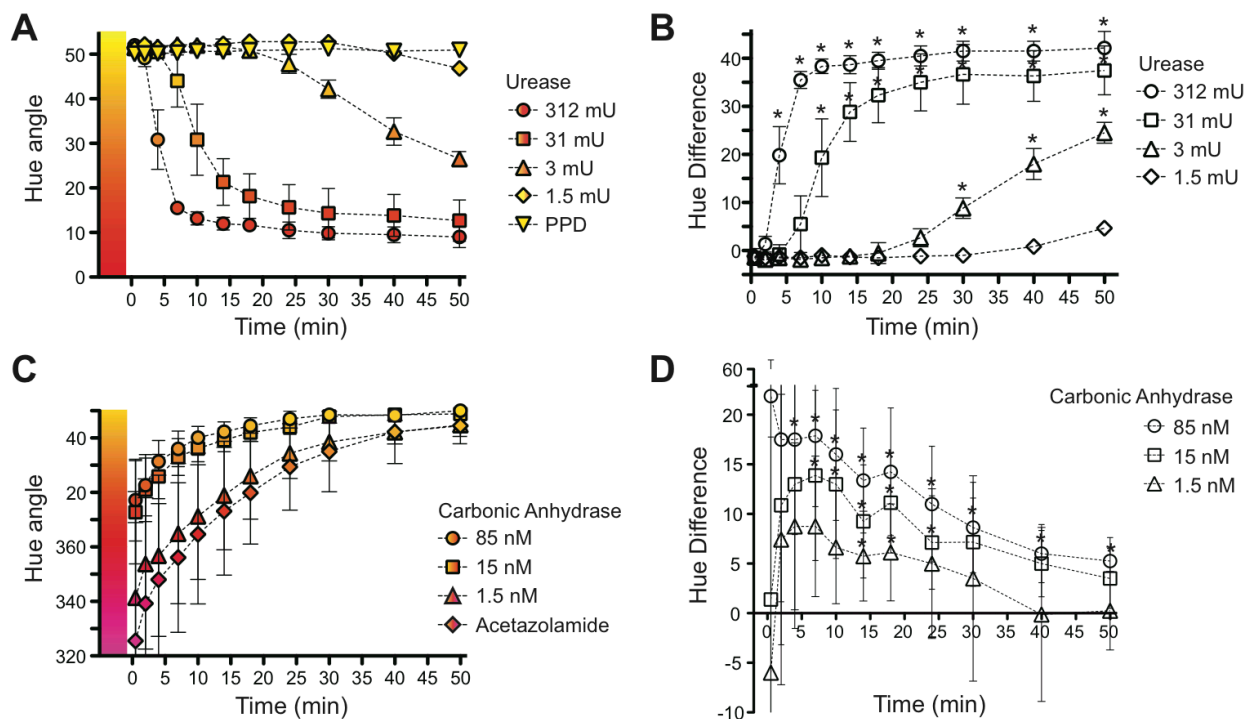

181  
182 **Figure 2.** Field test color change kinetics and sensitivities. (A) Assay color (expressed as  
183 average hue values) as a function of incubation time for the urease test using different urease  
184 standards (1.5–312 mU), and the average of their negative controls containing a urease inhibitor  
185 (PPD). (B) Hue difference of urease assays compared to their negative controls. (C) CA assay  
186 hue as a function of incubation time after adding different CA concentrations (1.5–85 nM), and  
187 the average of their negative controls in the presence of a CA inhibitor (acetazolamide). (D) Hue  
188 difference of CA standards compared to their negative controls. All conditions were assayed  
189 using six replicates. Error bars represent standard deviations. \* $p < 0.05$  between each condition  
190 and its respective negative control.

191  
192 For CA assays, however, the rapid and spontaneous bicarbonate dehydration, even  
193 without the enzyme, turns metacresol purple indicator to yellow within 30 minutes (**Figure 2C**).

194 The reaction has a window of 20–30 minutes where a coloration difference is noticeable between  
195 a CA-containing assay and an acetazolamide-containing test (negative control), with a maximum  
196 hue difference observed between 2 and 20 min (**Figure 2D**). When using 1.5 nM CA, we  
197 observed a subtle, but consistent, hue difference that was significant at 14 and 18 minutes.

198

### 199 **Field detection of urease and CA activity**

200 Urease and CA tests were used for on-site enzymatic activity detection in samples from a  
201 saline lake, ponds from calcareous fens, and iron oxide precipitates from ferrous springs.  
202 Biomass collected during a bloom event in Salt Lake and a sample of green filaments collected  
203 after the bloom were urease-positive in less than 20 minutes (**Figure 3A**).

204

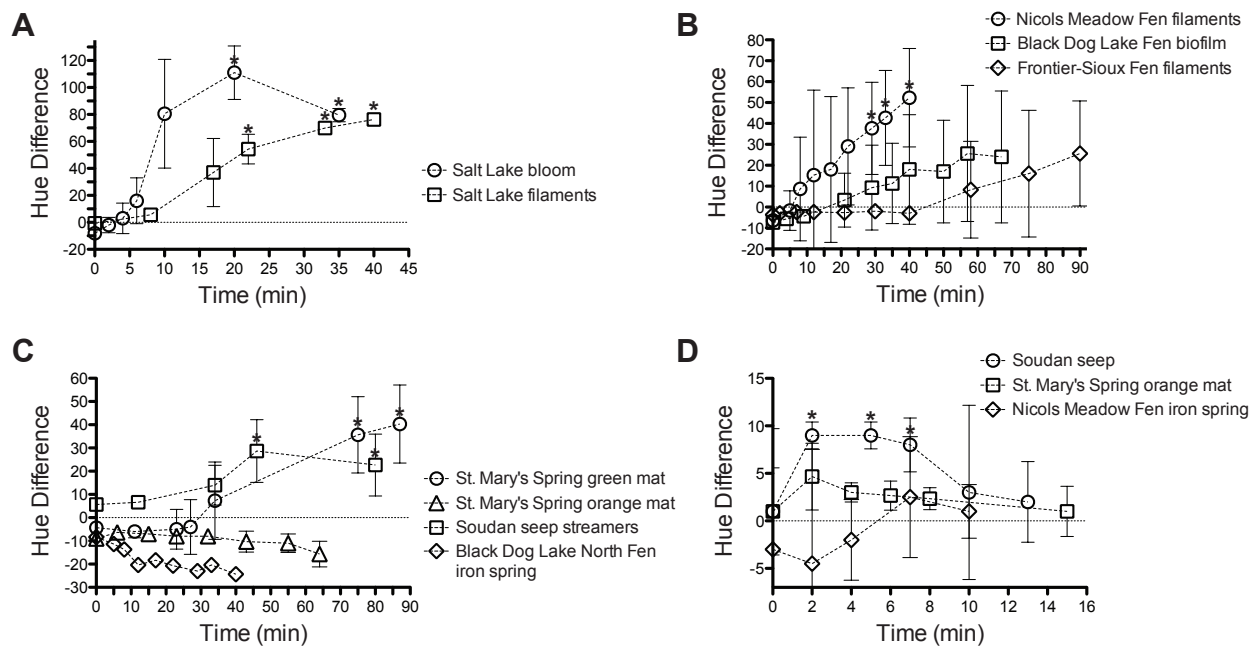

205

206 **Figure 3.** Field test color change using environmental samples. Hue difference from on-site  
207 urease assays of Salt Lake (A), calcareous fen (B), and iron spring (C) samples. (D) CA assay

208 hue difference of ferric precipitates. Error bars represent standard deviations. \* $p < 0.05$  between  
209 each sample and its respective negative control.

210

211 Black Dog Lake Fen and Nicols Meadow Fen samples were also positive for urease,  
212 although longer incubations were required and they showed less color change intensity than the  
213 samples from Salt Lake (**Figure 3B**). Green photosynthetic sheaths from Frontier-Sioux Nation  
214 Fen showed little urease activity, even after one hour of incubation. In organisms that do not  
215 constitutively express urease, its expression is likely induced when urea is available.<sup>24,25</sup> The  
216 higher urease activity in Salt Lake may therefore reflect urea accessibility and correlate with the  
217 bloom event observed in July 2019. Agriculture promotes eutrophication,<sup>26</sup> and in particular  
218 urea—the major worldwide fertilizer<sup>27</sup>—can be used by microbes as both N and C source.<sup>6</sup> Salt  
219 Lake is located in close proximity to farmland and its microbial communities may be sensitive to  
220 nearby fertilization practices. By contrast, less urease activity found in calcareous fen samples, in  
221 particular Frontier-Sioux Nation Fen, which is located near a State Wildlife Management Area,  
222 may reflect a lower agriculture impact (**Figure S6**).

223 Biofilms at St. Mary's Spring have a combination of green cyanobacterial filaments that  
224 were slightly positive for urease, and stalks of iron-oxidizing bacteria surrounded by few  
225 cyanobacteria and iron oxides, which were urease-negative (**Figure 3C**). Iron oxides from Black  
226 Dog Lake North Fen creek were also urease-negative. PPD-containing controls in these ferric  
227 precipitates, however, showed a slight color change (represented by a negative hue difference in  
228 **Figure 3C**), attributed to ammonia release from PPD degradation. The P–N bonds in  
229 phosphoramidates are unstable in aqueous solutions<sup>28</sup> and may release ammonia. Moderate  
230 transitions to red may lead to false positives, although its intensity was not comparable to the

231 positive reactions observed in other environments. Several other urease inhibitors not tested in  
232 this study<sup>29</sup> may prevent false positives, however, phosphoramidates (such as PPD) are among  
233 the most potent and specific urease inhibitors<sup>28</sup> and were therefore selected for the assay.

234 In contrast to urease, CA activity was not detected in Salt Lake and calcareous fen  
235 samples. Only Soudan seep samples were positive for CA when comparing hue values with those  
236 of negative controls (**Figure 3D**). CA is essential for carbon transport and pH regulation.<sup>7</sup>  
237 Microbes from Soudan sulfidic seeps were located at a site where recent road construction  
238 exposed sulfide outcrops that potentially generate acid rock drainage. As a mitigation attempt  
239 implemented by the Minnesota Department of Transportation, limestone was placed at the  
240 roadsides, affecting microbial populations that likely overexpress CA to tolerate high alkalinity  
241 ( $158 \pm 4$  mg/L  $\text{CaCO}_3$ ) and pH fluctuations. CA is also fundamental to  $\text{CO}_2$  concentrating  
242 mechanisms in photosynthesis; therefore, its expression is expected in photosynthetic biofilms.<sup>7</sup>  
243 It is possible that CA levels were below the detection limit of the field assay. While the urease  
244 assay was shown to be robust and shown to have low detection limits, the CA assay was limited  
245 by the nature of its catalyzed reaction (eq. 2), where only few minutes are available to visualize  
246 CA activity. In addition, carbonic anhydrases include at least six enzyme classes with no  
247 structural or sequence homology and, consequently, inhibitors may have varied effects. Although  
248 acetazolamide is a potent wide-spectrum CA inhibitor,<sup>30,31</sup> it is possible that certain microbial CA  
249 were not effectively inhibited, hindering a positive reaction. Alternatively, the enzyme may not  
250 have been readily accessible to the bicarbonate substrate and consequently the non-enzymatic  
251 reaction masked CA activity. Intracellular CA requires bicarbonate transport to the interior of the  
252 cell<sup>32</sup> and therefore the color change detection is dependent on  $\text{CO}_2$  escape from the cell interior.  
253 Additional transport processes may delay  $\text{CO}_2$  generation in the reaction tube. We failed,

254 however, to obtain environmental protein extracts with significant soluble CA activity (**Figure**  
255 **S7**), even in photosynthetic cells. We also found very low soluble urease activity from protein  
256 extracts (**Figure S7**), indicating that most on-site activity found may have been the result of  
257 extracellular, possibly membrane bound or extracellular polymeric substances (EPS)-associated  
258 urease, which was observed as residual urease activity of cell debris after protein extraction.

259

### 260 **Carbonate precipitation induced by urease and CA**

261 Differences in intensity and time to obtain a positive reaction serve as parameters to  
262 compare relative activities among sites, where the strongest urease activity was found in Salt  
263 Lake samples. To determine the potential MICP of urease and CA, we incubated Salt Lake  
264 filaments with lake water containing urea, showing a decrease in its  $\text{Ca}^{2+}$  concentration ( $14.4 \pm$   
265  $0.5$  mM) starting at Day 4, and depleting at Day 9 (**Figure 4A**). The calcium drop is interpreted  
266 as calcium carbonate precipitation, which was also observed by the solution turbidity  
267 (attributable to  $\text{CaCO}_3$ ) starting at Day 3–4 (**Figure 4B–D**). By contrast, incubations in the  
268 presence of PPD depleted only around one-third of the initial calcium after 12 days, having  
269 significantly higher calcium than incubations without PPD after Day 4 (**Figure 4A**).

270

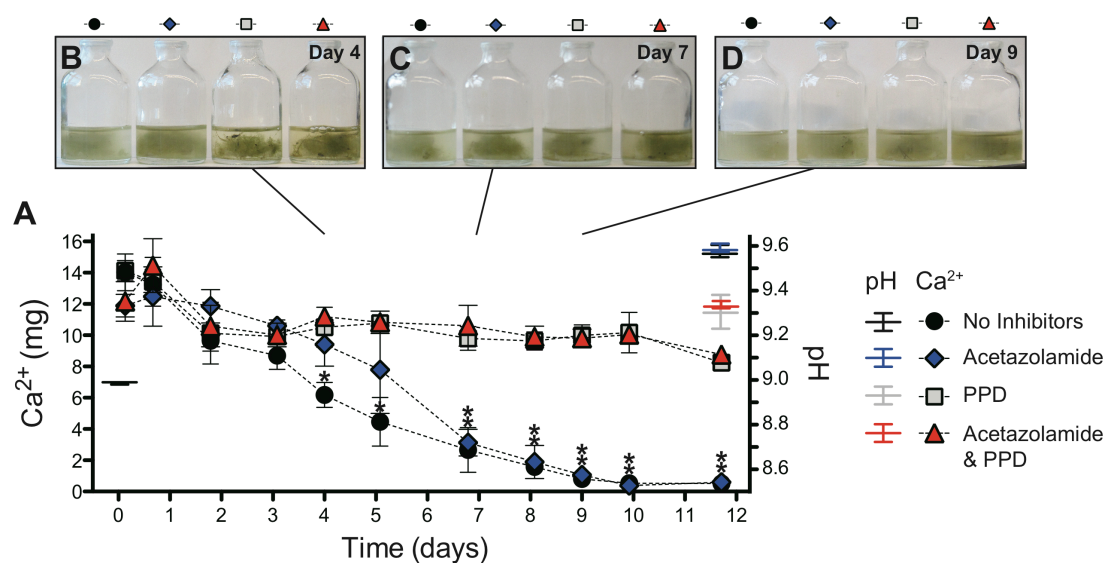

271  
272 **Figure 4.** Calcium depletion kinetics of Salt Lake water in the presence of its microbial biomass.  
273 (A) Calcium quantification (left axis) from aliquots taken over 12 days for triplicate incubations  
274 with a CA inhibitor (acetazolamide), a urease inhibitor (PPD) and conditions with and without  
275 both inhibitors. A pH increase (right axis) is observed at the end of the incubations. Standard  
276 deviation of triplicate assays are represented by the error bars, \* $p < 0.05$ . Photos of  
277 representative incubations at Day 4 (B), 7 (C) and 9 (D) show hazy solutions attributable to  
278 mineral precipitation.

279  
280 Filament incubations in the presence of acetazolamide, however, did not prevent calcium  
281 depletion (**Figure 4**). Therefore, urease, and not CA activity, is most likely responsible for  
282 carbonate precipitation under the studied conditions, consistent with the enzymatic activity  
283 observed in the field. Between Days 4 and 7, however, a delay in calcium depletion with  
284 acetazolamide compared to the condition without inhibitor may indicate a possible CA influence  
285 on  $\text{CaCO}_3$  precipitation dynamics. Both enzymes may synergistically affect carbon precipitation,  
286 as suggested previously,<sup>33</sup> via rapid bicarbonate generation by CA (eq. 2) from  $\text{CO}_2$  produced by

287 urease (eq. 1), providing  $\text{CO}_3^{2-}$  and neutralizing the acidity produced by  $\text{CO}_2$  hydration. The  
288 mechanism by which urease promoted  $\text{CaCO}_3$  precipitation is attributable to a pH increase  
289 during incubations compared to the lake water initial pH (**Figure 4A**). Without PPD, the pH rises  
290 more than 0.5 units in 12 days, increasing the saturation with respect to carbonate minerals  
291 (**Figure S8**).

292         Following 12 days, the filaments were covered by a white precipitate, extensively found  
293 in incubations without inhibitors or with acetazolamide only. Under the microscope, green  
294 trichomes were encrusted by precipitates, which appeared white under phase contrast, blackish  
295 under bright field and were autofluorescent (**Figure 5A**). The encrusting particles may  
296 correspond to magnesium-containing calcium carbonates, which have been observed to emit  
297 wide-spectrum fluorescence.<sup>34</sup> Additionally, characteristic signals of calcium carbonate  
298 polymorphs, such as vaterite, monohydrocalcite, calcite, ikaite, and aragonite, along with  
299 thenardite ( $\text{Na}_2\text{SO}_4$ , likely the result of high Na and  $\text{SO}_4$  in Salt Lake) and quartz (presumably  
300 from diatom frustules) were detected in the precipitates by micro-XRD (**Figure 5B**).

301



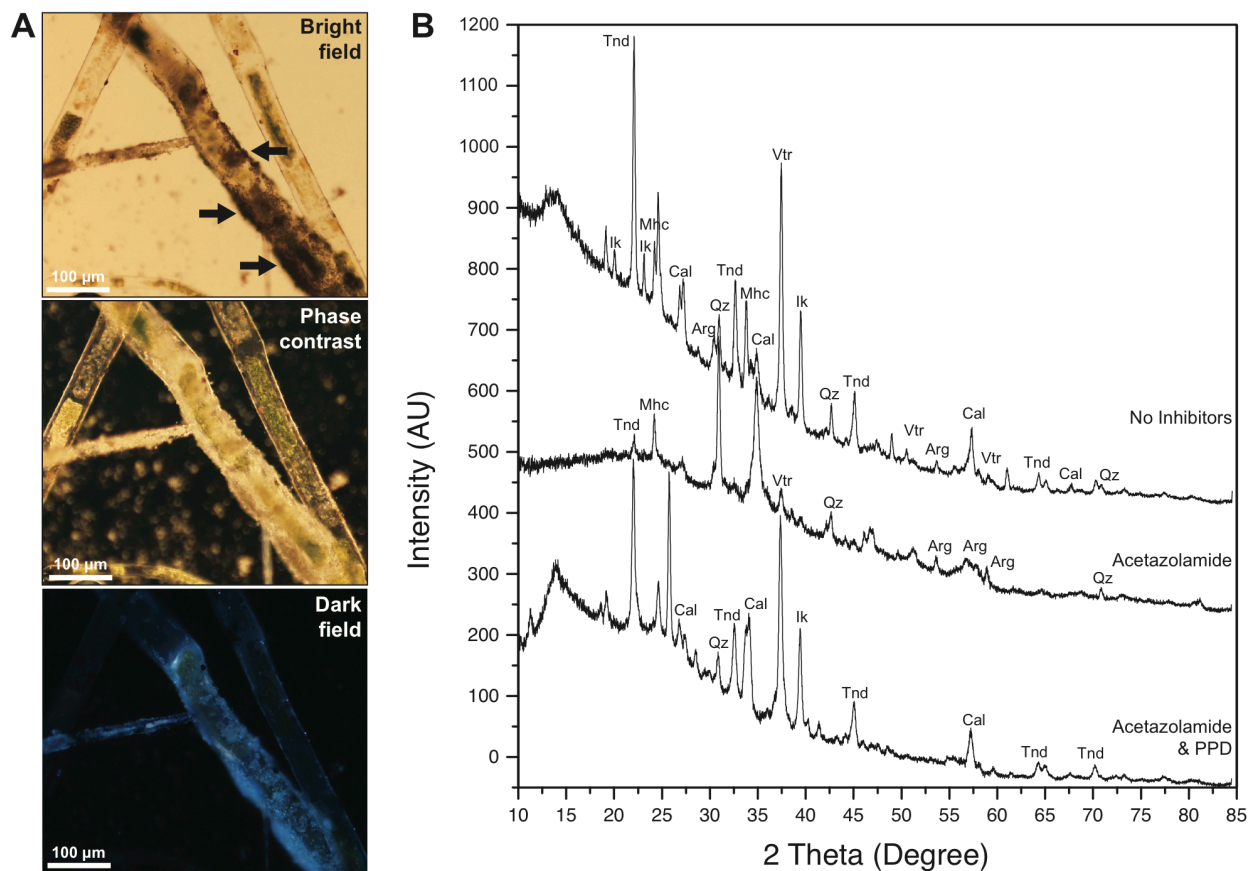

302

303 **Figure 5.** Salt Lake microbial sheaths after incubations. (A) Filament photomicrographs after 12  
304 days of incubation, showing black precipitates covering the sheaths under bright field (black  
305 arrows, top panel) that appeared white under phase contrast (middle panel) and have wide-  
306 spectrum autofluorescence (lower panel, dark field showing 420 nm-excited 450 nm long-pass  
307 emission). (B) Micro-XRD of precipitates after incubations without inhibitors, with  
308 acetazolamide, and with both inhibitors. Mineral abbreviations: Arg, aragonite; Cal, calcite; Ik,  
309 ikaite; Mhc, monohydrocalcite; Qz, quartz; Tnd, thenardite; Vtr, vaterite.

310

311 **Potential applications of urease and CA field tests**

312           The field detection of urease activity could prove useful for evaluating the predictability  
313 of fertilizer efficiency. Urea-based fertilizers are hydrolyzed by soil bacteria, resulting in  
314 volatilization and nitrogen loss to the atmosphere, which is not utilized by crops.<sup>35,36</sup> Although  
315 not evaluated in this study, the use of a simple test that could be employed by farmers to  
316 determine on-site urease activity from soils may help decide appropriate fertilizer types for a  
317 given region. The field test may also be useful for screening environmental organisms with high  
318 urease activity that can be used for engineering applications. Urease-driven MICP has been  
319 explored in recent years for cementation and restoration of diverse structures, from art sculptures  
320 to buildings, as well as bedrock plugging for enhanced oil recovery.<sup>3,13,37</sup> Rapid on-site evaluation  
321 of urease activity could help predict the efficiency of restoration approaches, instead of waiting  
322 for long-term reactive solutions.

323           A simple and economical test to detect enzymatic activity in the field may also help us  
324 understand the microbial processes that contribute to the chemistry and mineralogy of poorly  
325 studied sites. For example, though calcareous fens and other peatland ecosystems are extensive  
326 in some regions and are relevant carbon sinks,<sup>38</sup> little information exists about the activity of  
327 their microbial communities, in particular the activities of urease and CA. We showed here not  
328 only that calcareous fen microbes have the potential to express urease, but also that their urease  
329 is active *in situ*, where urease-driven MICP could occur. Though the increasing use of fertilizers  
330 has been linked to ecosystem damage, it may be possible to encourage the use of urea-based  
331 fertilizers in regions that are hydrologically connected to calcium-rich areas (such as calcareous  
332 fens) where indigenous microbes are known to drive MICP, resulting in a sustainable carbon  
333 sequestration alternative.<sup>39</sup>

334 An economical test may be useful for educational demonstrations, and also could prove  
335 valuable to determine temporal variations of environmental metabolisms along different seasons,  
336 days, or even hours, which may otherwise prove difficult because of budget constraints. In-field  
337 tests may be convenient to assess the influence of MICP on microbialites, particularly where  
338 bicarbonate transport and urease-related genes are known to be present,<sup>40</sup> which could help us  
339 understand the elusive metabolisms involved in ancient microbialite formation.<sup>41,42</sup>

340 Top-down molecular studies of microbial communities and their environmental effects  
341 have exploded in the past decade, increasing our understanding of uncultivable microorganisms  
342 as well as the diversity of distinct environments in a microbe-dominated Earth. The information  
343 currently obtained via high-throughput sequencing of environmental microbes should be  
344 complemented with field activity assays to assess not only metabolic potential, but also microbial  
345 activity in a given environment. Enzymatic activities not only represent protein expression, but  
346 also the microbial effects on the environment, which in this study has been related to carbonate  
347 precipitation. We anticipate that field-based bottom-up approaches will aid in addressing  
348 challenging questions, such as determining the microbial role in mineral formation, as well as  
349 providing new eco-friendly technologies for engineering challenges. To our knowledge, this is  
350 the first field environmental urease and CA evaluation using an inexpensive and fast method  
351 designed with conventional laboratory materials. We expect that a variety of other environments  
352 can be tested using this method by other researchers, expanding our knowledge of environmental  
353 protein expression and its effects on MICP.

354

355 ASSOCIATED CONTENT

356 **Supporting Information.**

357 Preparation protocols for the field urease and CA activity assays, methods for protein extraction  
358 and microscope visualization, and related field images and sampling information.

359

360 AUTHOR INFORMATION

361 **Corresponding Authors:**

362 \*E-mail (FMF): medinaferrer@gmail.com

363 \*E-mail (JVB): baileyj@umn.edu

364 **ORCID:**

365 Fernando Medina Ferrer: 0000-0001-9864-7627

366 Kathryn Hobart: 0000-0003-3888-975X

367 Jake V. Bailey: 0000-0002-7655-5200

368

369 ACKNOWLEDGMENT

370 We gratefully thank Michael Rosen, Matt Oberhelman, Kim Lapakko, Beverly Flood,  
371 Javier García Barriocanal and Barbara MacGregor for field/laboratory support and helpful  
372 discussions. The authors declare no competing financial interest. Parts of this work were carried  
373 out in the Characterization Facility, University of Minnesota, which receives partial support from  
374 NSF through the MRSEC program. This research was funded by a NASA award NNX14AK20G  
375 to JVB. FMF acknowledge the support from the UMN Graduate School DDF, Fulbright

376 #15150776 and CONICYT folio-72160214 fellowships. KH was supported by a MnDRIVE  
377 Environment initiative grant at the University of Minnesota.

378

## 379 REFERENCES

380 (1) Sarayu, K.; Iyer, N. R.; Murthy, A. R. Exploration on the Biotechnological Aspect of the  
381 Ureolytic Bacteria for the Production of the Cementitious Materials--a Review. *Appl. Biochem.*  
382 *Biotechnol.* **2014**, 172 (5), 2308–2323. <https://doi.org/10.1007/s12010-013-0686-0>.

383 (2) Bose, H.; Satyanarayana, T. Microbial Carbonic Anhydrases in Biomimetic Carbon  
384 Sequestration for Mitigating Global Warming: Prospects and Perspectives. *Front. Microbiol.*  
385 **2017**, 8, 1615. <https://doi.org/10.3389/fmicb.2017.01615>.

386 (3) Krajewska, B. Urease-Aided Calcium Carbonate Mineralization for Engineering  
387 Applications: A Review. *J. Adv. Res.* **2018**, 13, 59–67.  
388 <https://doi.org/10.1016/j.jare.2017.10.009>.

389 (4) Seifan, M.; Berenjian, A. Microbially Induced Calcium Carbonate Precipitation: A  
390 Widespread Phenomenon in the Biological World. *Appl. Microbiol. Biotechnol.* **2019**, 103 (12),  
391 4693–4708. <https://doi.org/10.1007/s00253-019-09861-5>.

392 (5) Zhu, T.; Dittrich, M. Carbonate Precipitation through Microbial Activities in Natural  
393 Environment, and Their Potential in Biotechnology: A Review. *Front. Bioeng. Biotechnol.* **2016**,  
394 4. <https://doi.org/10.3389/fbioe.2016.00004>.

395 (6) Krausfeldt, L. E.; Farmer, A. T.; Castro Gonzalez, H. F.; Zepernick, B. N.; Campagna, S.  
396 R.; Wilhelm, S. W. Urea Is Both a Carbon and Nitrogen Source for *Microcystis Aeruginosa*:

- 397 Tracking  $^{13}\text{C}$  Incorporation at Bloom PH Conditions. *Front. Microbiol.* **2019**, 10, 1064.  
398 <https://doi.org/10.3389/fmicb.2019.01064>.
- 399 (7) Kumar, R. S. S.; Ferry, J. G. Prokaryotic Carbonic Anhydrases of Earth's Environment.  
400 *Subcell. Biochem.* **2014**, 75, 77–87. [https://doi.org/10.1007/978-94-007-7359-2\\_5](https://doi.org/10.1007/978-94-007-7359-2_5).
- 401 (8) Bachmeier, K. L.; Williams, A. E.; Warmington, J. R.; Bang, S. S. Urease Activity in  
402 Microbiologically-Induced Calcite Precipitation. *J. Biotechnol.* **2002**, 93 (2), 171–181.  
403 [https://doi.org/10.1016/s0168-1656\(01\)00393-5](https://doi.org/10.1016/s0168-1656(01)00393-5).
- 404 (9) Okwadha, G. D. O.; Li, J. Optimum Conditions for Microbial Carbonate Precipitation.  
405 *Chemosphere* **2010**, 81 (9), 1143–1148. <https://doi.org/10.1016/j.chemosphere.2010.09.066>.
- 406 (10) Achal, V.; Pan, X. Characterization of Urease and Carbonic Anhydrase Producing  
407 Bacteria and Their Role in Calcite Precipitation. *Curr. Microbiol.* **2011**, 62 (3), 894–902.  
408 <https://doi.org/10.1007/s00284-010-9801-4>.
- 409 (11) Fujita, Y.; Taylor, J. L.; Gresham, T. L. T.; Delwiche, M. E.; Colwell, F. S.; McIning, T. L.;  
410 Petzke, L. M.; Smith, R. W. Stimulation of Microbial Urea Hydrolysis in Groundwater to  
411 Enhance Calcite Precipitation. *Environ. Sci. Technol.* **2008**, 42 (8), 3025–3032.  
412 <https://doi.org/10.1021/es702643g>.
- 413 (12) Cuthbert, M. O.; McMillan, L. A.; Handley-Sidhu, S.; Riley, M. S.; Tobler, D. J.;  
414 Phoenix, V. R. A Field and Modeling Study of Fractured Rock Permeability Reduction Using  
415 Microbially Induced Calcite Precipitation. *Environ. Sci. Technol.* **2013**, 47 (23), 13637–13643.  
416 <https://doi.org/10.1021/es402601g>.

417 (13) Dhami, N. K.; Reddy, M. S.; Mukherjee, A. Biomineralization of Calcium Carbonates and  
418 Their Engineered Applications: A Review. *Front. Microbiol.* **2013**, 4, 314.

419 <https://doi.org/10.3389/fmicb.2013.00314>.

420 (14) Gat, D.; Ronen, Z.; Tsesarsky, M. Soil Bacteria Population Dynamics Following  
421 Stimulation for Ureolytic Microbial-Induced CaCO<sub>3</sub> Precipitation. *Environ. Sci. Technol.* **2016**,  
422 50 (2), 616–624. <https://doi.org/10.1021/acs.est.5b04033>.

423 (15) Graddy, C. M. R.; Gomez, M. G.; Kline, L. M.; Morrill, S. R.; DeJong, J. T.; Nelson, D.  
424 C. Diversity of Sporosarcina-like Bacterial Strains Obtained from Meter-Scale Augmented and  
425 Stimulated Biocementation Experiments. *Environ. Sci. Technol.* **2018**, 52 (7), 3997–4005.  
426 <https://doi.org/10.1021/acs.est.7b04271>.

427 (16) Power, I. M.; Harrison, A. L.; Dipple, G. M. Accelerating Mineral Carbonation Using  
428 Carbonic Anhydrase. *Environ. Sci. Technol.* **2016**, 50 (5), 2610–2618.  
429 <https://doi.org/10.1021/acs.est.5b04779>.

430 (17) Mohsenpour, M.; Noormohammadi, Z.; Irani, S.; Amirmozafari, N. Expression of an  
431 Environmentally Friendly Enzyme, Engineered Carbonic Anhydrase, in Escherichia coli. *Int. J.*  
432 *Environ. Res.* **2019**, 13, 295–301. <https://doi.org/10.1007/s41742-019-00178-9>.

433 (18) Thillainayagam, A. V.; Arvind, A. S.; Cook, R. S.; Harrison, I. G.; Tabaqchali, S.;  
434 Farthing, M. J. Diagnostic Efficiency of an Ultrarapid Endoscopy Room Test for Helicobacter  
435 Pylori. *Gut* **1991**, 32 (5), 467–469. <https://doi.org/10.1136/gut.32.5.467>.

436 (19) Ross, P.; Behar, M. Test Strip for h. Pylori Detection. US20120094371A1, April 19,  
437 2012.

- 438 (20) Fehder, C. G. Carbon Dioxide Indicator Device. US4728499A, March 1, 1988.
- 439 (21) Dean, W. E.; Gorham, E.; Swaine, D. J. Geochemistry of Surface Sediments of Minnesota  
440 Lakes. In *Elk Lake, Minnesota: Evidence for Rapid Climate Change in the North-Central United*  
441 *States*; Bradbury, J. P., Dean, W. E., Eds.; Geological Society of America Special Paper 276:  
442 Boulder, Colorado, 1993; pp 115–133. <https://doi.org/10.1130/SPE276-p115>.
- 443 (22) Almendinger, J. E.; Leete, J. H. Peat Characteristics and Groundwater Geochemistry of  
444 Calcareous Fens in the Minnesota River Basin, U.S.A. *Biogeochemistry* **1998**, 43 (1), 25.  
445 <https://doi.org/10.1023/A:1005905431071>.
- 446 (23) Hesse, K.-F.; Küppers, H. Refinement of the Structure of Ikaite,  $\text{CaCO}_3 \cdot 6\text{H}_2\text{O}$ . *Z. Krist.-*  
447 *Cryst. Mater.* **1983**, 163 (3-4), 227–231. <https://doi.org/10.1524/zkri.1983.163.3-4.227>.
- 448 (24) Mobley, H. L.; Island, M. D.; Hausinger, R. P. Molecular Biology of Microbial Ureases.  
449 *Microbiol. Rev.* **1995**, 59 (3), 451–480.
- 450 (25) Zhou, Y.; Zhang, X.; Li, X.; Jia, P.; Dai, R. Evaluation of Changes in Microcystis  
451 Aeruginosa Growth and Microcystin Production by Urea via Transcriptomic Surveys. *Sci. Total*  
452 *Environ.* **2019**, 655, 181–187. <https://doi.org/10.1016/j.scitotenv.2018.11.100>.
- 453 (26) Paerl, H. W.; Scott, J. T.; McCarthy, M. J.; Newell, S. E.; Gardner, W. S.; Havens, K. E.;  
454 Hoffman, D. K.; Wilhelm, S. W.; Wurtsbaugh, W. A. It Takes Two to Tango: When and Where  
455 Dual Nutrient (N & P) Reductions Are Needed to Protect Lakes and Downstream Ecosystems.  
456 *Environ. Sci. Technol.* **2016**, 50 (20), 10805–10813. <https://doi.org/10.1021/acs.est.6b02575>.



- 457 (27) Glibert, P. M.; Maranger, R.; Sobota, D. J.; Bouwman, L. The Haber Bosch-Harmful  
458 Algal Bloom (HB-HAB) Link. *Environ. Res. Lett.* **2014**, 9, 105001.  
459 <https://doi.org/10.1088/1748-9326/9/10/105001>.
- 460 (28) Kafarski, P.; Talma, M. Recent Advances in Design of New Urease Inhibitors: A Review.  
461 *J. Adv. Res.* **2018**, 13, 101–112. <https://doi.org/10.1016/j.jare.2018.01.007>.
- 462 (29) Amtul, Z.; Rahman, A.-U.; Siddiqui, R. A.; Choudhary, M. I. Chemistry and Mechanism  
463 of Urease Inhibition. *Curr. Med. Chem.* **2002**, 9 (14), 1323–1348.  
464 <https://doi.org/10.2174/0929867023369853>.
- 465 (30) Zimmerman, S. A.; Ferry, J. G.; Supuran, C. T. Inhibition of the Archaeal Beta-Class  
466 (Cab) and Gamma-Class (Cam) Carbonic Anhydrases. *Curr. Top. Med. Chem.* **2007**, 7 (9), 901–  
467 908. <https://doi.org/10.2174/156802607780636753>.
- 468 (31) Zimmerman, S.; Innocenti, A.; Casini, A.; Ferry, J. G.; Scozzafava, A.; Supuran, C. T.  
469 Carbonic Anhydrase Inhibitors. Inhibition of the Prokariotic Beta and Gamma-Class Enzymes  
470 from Archaea with Sulfonamides. *Bioorg. Med. Chem. Lett.* **2004**, 14 (24), 6001–6006.  
471 <https://doi.org/10.1016/j.bmcl.2004.09.085>.
- 472 (32) Giri, A.; Banerjee, U. C.; Kumar, M.; Pant, D. Intracellular Carbonic Anhydrase from  
473 *Citrobacter Freundii* and Its Role in Bio-Sequestration. *Bioresour. Technol.* **2018**, 267, 789–792.  
474 <https://doi.org/10.1016/j.biortech.2018.07.089>.
- 475 (33) Dhami, N. K.; Reddy, M. S.; Mukherjee, A. Synergistic Role of Bacterial Urease and  
476 Carbonic Anhydrase in Carbonate Mineralization. *Appl. Biochem. Biotechnol.* **2014**, 172 (5),  
477 2552–2561. <https://doi.org/10.1007/s12010-013-0694-0>.

- 478 (34) Yoshida, N.; Higashimura, E.; Saeki, Y. Catalytic Biomineralization of Fluorescent  
479 Calcite by the Thermophilic Bacterium *Geobacillus Thermoglucosidasius*. *Appl. Environ.*  
480 *Microbiol.* **2010**, 76 (21), 7322–7327. <https://doi.org/10.1128/AEM.01767-10>.
- 481 (35) Cantarella, H.; Otto, R.; Soares, J. R.; Silva, A. G. de B. Agronomic Efficiency of NBPT  
482 as a Urease Inhibitor: A Review. *J. Adv. Res.* **2018**, 13, 19–27.  
483 <https://doi.org/10.1016/j.jare.2018.05.008>.
- 484 (36) Modolo, L. V.; da-Silva, C. J.; Brandão, D. S.; Chaves, I. S. A Minireview on What We  
485 Have Learned about Urease Inhibitors of Agricultural Interest since Mid-2000s. *J. Adv. Res.*  
486 **2018**, 13, 29–37. <https://doi.org/10.1016/j.jare.2018.04.001>.
- 487 (37) Phillips, A. J.; Cunningham, A. B.; Gerlach, R.; Hiebert, R.; Hwang, C.; Lomans, B. P.;  
488 Westrich, J.; Mantilla, C.; Kirksey, J.; Esposito, R.; et al. Fracture Sealing with Microbially-  
489 Induced Calcium Carbonate Precipitation: A Field Study. *Environ. Sci. Technol.* **2016**, 50 (7),  
490 4111–4117. <https://doi.org/10.1021/acs.est.5b05559>.
- 491 (38) Lunt, P. H.; Fyfe, R. M.; Tappin, A. D. Role of Recent Climate Change on Carbon  
492 Sequestration in Peatland Systems. *Sci. Total Environ.* **2019**, 667, 348–358.  
493 <https://doi.org/10.1016/j.scitotenv.2019.02.239>
- 494 (39) Mitchell, A. C.; Dideriksen, K.; Spangler, L. H.; Cunningham, A. B.; Gerlach, R.  
495 Microbially Enhanced Carbon Capture and Storage by Mineral-Trapping and Solubility-  
496 Trapping. *Environ. Sci. Technol.* **2010**, 44 (13), 5270–5276. <https://doi.org/10.1021/es903270w>.
- 497 (40) Warden, J. G.; Casaburi, G.; Omelon, C. R.; Bennett, P. C.; Breecker, D. O.; Foster, J. S.  
498 Characterization of Microbial Mat Microbiomes in the Modern Thrombolite Ecosystem of Lake

499 Clifton, Western Australia Using Shotgun Metagenomics. *Front. Microbiol.* **2016**, 7, 1064.

500 <https://doi.org/10.3389/fmicb.2016.01064>.

501 (41) Bosak, T.; Greene, S.; Newman, D. K. A Likely Role for Anoxygenic Photosynthetic

502 Microbes in the Formation of Ancient Stromatolites. *Geobiology* **2007**, 5 (2), 119–126.

503 (42) Bosak, T.; Newman, D. K. Microbial Nucleation of Calcium Carbonate in the

504 Precambrian. *Geology* **2003**, 31 (7), 577–580. <https://doi.org/10.1130/0091->

505 7613(2003)031<0577:MNOCCI>2.0.CO;2.
